# Supplementary material for: The Frequency of Fast Food Consumption in Relation to Wheeze and Asthma Among Adolescents in Gauteng and North West Provinces, South Africa
Source: PubMed Central journal article supplement (PMC7143251; doi:10.3390/ijerph17061994), 2020-03-18
Supplement: ijerph-17-01994-s001.pdf [file ijerph-17-01994-s001.pdf]

**Supplementary Table 1: Adjusted odds ratios of wheeze and fast foods among the study participants (N = 3641)**

| <b>Characteristics</b>                                | <b>Odds Ratio</b> | <b>95% CI</b> | <b>P-Value</b> |
|-------------------------------------------------------|-------------------|---------------|----------------|
| <b>Sex</b>                                            |                   |               |                |
| Female                                                | 1                 | 1             | 1              |
| Male                                                  | 0.76              | 0.53 – 1.36   | 0.376          |
| <b>Type of house</b>                                  |                   |               |                |
| Brick                                                 | 1                 | 1             | 1              |
| Mud                                                   | 1.69              | 0.95 – 2.89   | 0.074          |
| Corrugated iron                                       | 1.31              | 1.01 – 1.70   | 0.048          |
| Combination                                           | 0.80              | 0.51 – 1.28   | 0.363          |
| Other                                                 | 0.73              | 0.43 – 1.22   | 0.228          |
| <b>Residential fuel type used for cooking/heating</b> |                   |               |                |
| Electricity                                           | 1                 |               | 1              |
| Gas                                                   | 0.84              | 0.56 – 1.26   | 0.394          |
| Paraffin                                              | 0.76              | 0.51 – 1.10   | 0.145          |
| Open fires (wood or coal)                             | 1.28              | 1.09 – 1.57   | 0.031          |
| <b>Vigorous physical activity per week</b>            |                   |               |                |
| Never                                                 | 1                 | 1             | 1              |
| Once or twice per week                                | 1.42              | 1.19 – 1.70   | <0.001         |

|                                                                   |      |             |        |
|-------------------------------------------------------------------|------|-------------|--------|
| Three times or more per week                                      | 1.60 | 1.32 – 1.97 | <0.001 |
| <b>Frequency of trucks passing near the residence on weekdays</b> |      |             |        |
| Never                                                             | 1    | 1           | 1      |
| Seldom                                                            | 1.20 | 0.93 – 1.56 | 0.158  |
| Frequently                                                        | 1.50 | 1.13 – 1.99 | 0.005  |
| Always                                                            | 1.43 | 1.14 – 1.79 | 0.002  |
| <b>ETS exposure at home in the past 30 days</b>                   |      |             |        |
| No                                                                | 1    | 1           | 1      |
| Yes                                                               | 1.48 | 1.23 – 1.77 | <0.001 |
| <b>Do you smoke cigarette?</b>                                    |      |             |        |
| No                                                                | 1    | 1           | 1      |
| Yes                                                               | 1.80 | 1.24 – 2.62 | <0.001 |

---

1: Reference category

**Supplementary Table 2: Adjusted odds ratios of asthma and fast foods among the study participants (N = 3641)**

| Characteristics                                       | Odds Ratio | 95% CI      | P-Value |
|-------------------------------------------------------|------------|-------------|---------|
| <b>Sex</b>                                            |            |             |         |
| Female                                                | 1          | 1           | 1       |
| Male                                                  | 0.71       | 0.40 – 1.21 | 0.497   |
| <b>Type of house</b>                                  |            |             |         |
| Brick                                                 | 1          | 1           | 1       |
| Mud                                                   | 3.13       | 1.74 – 5.62 | <0.001  |
| Corrugated iron                                       | 0.99       | 0.69 – 1.43 | 0.970   |
| Combination                                           | 1.58       | 0.94 – 2.66 | 0.087   |
| Other                                                 | 0.46       | 0.18 – 1.17 | 0.105   |
| <b>Residential fuel type used for cooking/heating</b> |            |             |         |
| Electricity                                           | 1          | 1           | 1       |
| Gas                                                   | 1.26       | 0.78 – 2.02 | 0.348   |
| Paraffin                                              | 0.66       | 0.38 – 1.14 | 0.133   |
| Open fires (wood or coal)                             | 1.44       | 1.28 – 1.69 | <0.001  |
| <b>Vigorous physical activity per week</b>            |            |             |         |
| Never                                                 | 1          | 1           | 1       |

|                                                                   |      |             |        |
|-------------------------------------------------------------------|------|-------------|--------|
| Once or twice per week                                            | 1.33 | 1.04 – 1.70 | 0.021  |
| Three times or more per week                                      | 1.75 | 1.35 – 2.28 | <0.001 |
| <b>Frequency of trucks passing near the residence on weekdays</b> |      |             |        |
| Never                                                             | 1    | 1           | 1      |
| Seldom                                                            | 1.04 | 0.79 – 1.39 | 0.739  |
| Frequently                                                        | 0.95 | 0.66 – 1.36 | 0.767  |
| Always                                                            | 1.69 | 1.49 – 1.98 | <0.001 |
| <b>ETS exposure at home in the past 30 days</b>                   |      |             |        |
| No                                                                | 1    | 1           | 1      |
| Yes                                                               | 0.79 | 0.61 – 1.02 | 0.068  |
| <b>Do you smoke cigarette?</b>                                    |      |             |        |
| No                                                                | 1    | 1           | 1      |
| Yes                                                               | 1.74 | 1.12 – 2.71 | 0.015  |

---

1: Reference category
